# Supplementary material
Source: PubMed Central journal article supplement (PMC3008208)
Supplement: NIHMS252658-supplement-01.pdf [file NIHMS252658-supplement-01.pdf]

Exogenous IL-4 administration to ECTV-WT infected C57BL/6 mice

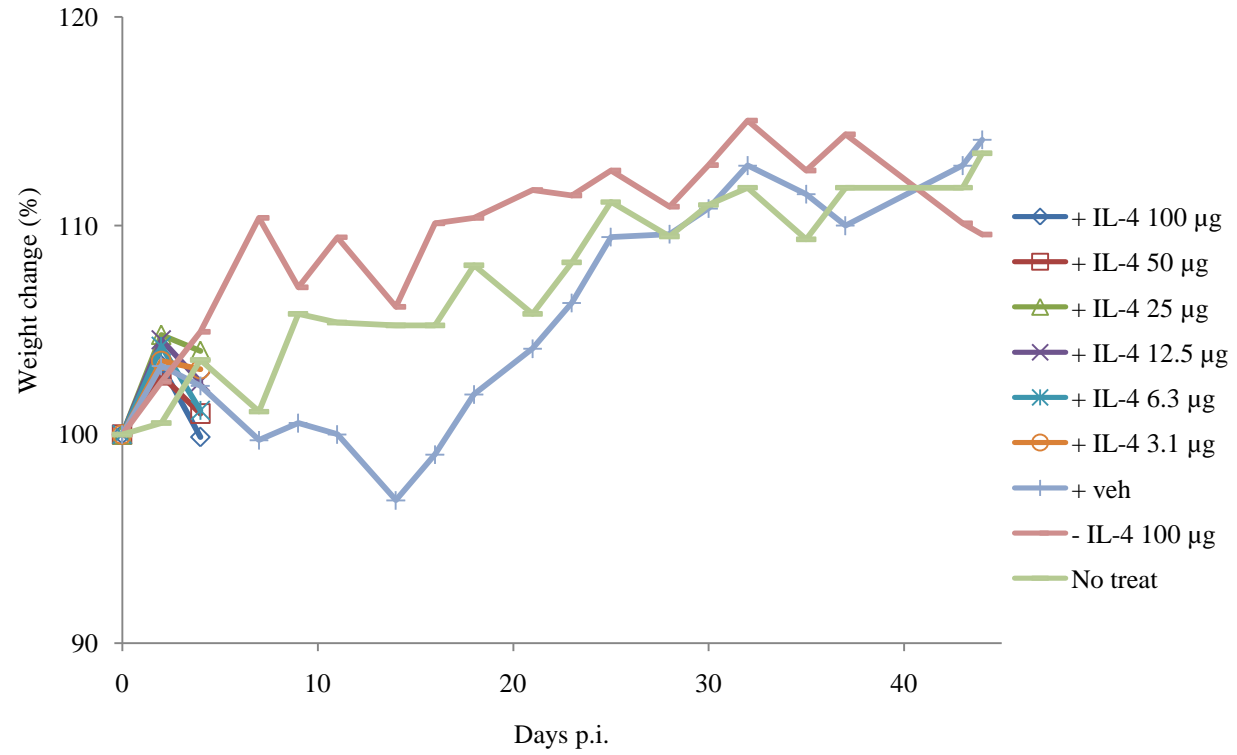

Supp. Fig 1

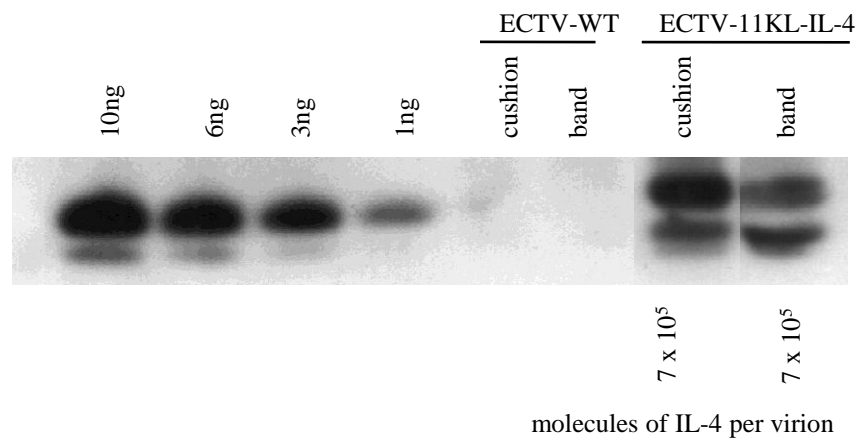

Supp. Fig. 2

**Supplemental Table 1.** ECTV-11KM-IL-4 severe disease is mediated through the IL-4 receptor

| <b>Strain<sup>1</sup></b>   | <b>Challenge virus</b> | <b>Mean time to death</b> | <b>Mortality (%<sup>3</sup>)</b> |
|-----------------------------|------------------------|---------------------------|----------------------------------|
| BALB/cJ                     | -WT                    | NA <sup>2</sup>           | 0/4 (0)                          |
| BALB/cJ                     | -SSE-IL-4              | 8.5 ± 1.0 <sup>4</sup>    | 4/4 (100) <sup>4</sup>           |
| BALB/c-IL-4R <sup>-/-</sup> | -WT                    | NA                        | 0/4 (0)                          |
| BALB/c-IL-4R <sup>-/-</sup> | -SSE-IL-4              | NA                        | 0/4 (0)                          |

<sup>1</sup>Wild type (BALB/cJ) or IL-4 receptor knockout mice (BALB/c-IL-4R<sup>-/-</sup>) were vaccinated by tail scarification with 2 x 10<sup>5</sup> PFU of Dryvax<sup>TM</sup>. Four weeks later mice were challenged in the right-rear FP with 1.5 x 10<sup>4</sup> PFU of the indicated virus.

<sup>2</sup>NA – not applicable.

<sup>3</sup>Percent mortality.

<sup>4</sup>P<0.05 compared to ECTV-WT control.

**Supplemental Table 2.** Exogenous administration of IL-4 in combination with FP ECTV-WT infection results in lethality and recapitulates ECTV-IL-4 infections in C57BL/6 mice.

| Virus <sup>1</sup> | IL-4 | Vehicle | BID dosing for 5 days <sup>2</sup> |    |    |      |     |     | Mean time to death | Mortality (%)          |
|--------------------|------|---------|------------------------------------|----|----|------|-----|-----|--------------------|------------------------|
|                    |      |         | 100                                | 50 | 25 | 12.5 | 6.3 | 3.1 |                    |                        |
| WT                 | +    | -       | +                                  |    |    |      |     |     | 7±0                | 4/4 (100) <sup>3</sup> |
| WT                 | +    | -       |                                    | +  |    |      |     |     | 7±0                | 4/4 (100) <sup>3</sup> |
| WT                 | +    | -       |                                    |    | +  |      |     |     | 7±0                | 4/4 (100) <sup>3</sup> |
| WT                 | +    | -       |                                    |    |    | +    |     |     | 7±0                | 4/4 (100) <sup>3</sup> |
| WT                 | +    | -       |                                    |    |    |      | +   |     | 7±0                | 4/4 (100) <sup>3</sup> |
| WT                 | +    | -       |                                    |    |    |      |     | +   | 7±0                | 2/4 (50) <sup>4</sup>  |
| WT                 | -    | +       |                                    |    |    |      |     |     |                    | 0                      |
| -                  | +    | -       | +                                  |    |    |      |     |     |                    | 0                      |
| -                  | -    | -       | -                                  | -  | -  | -    | -   | -   |                    | 0                      |

<sup>1</sup>C57BL/6 mice were infected with  $3 \times 10^4$  PFU of wild type ECTV in the FP.

<sup>2</sup>IP bolus injections ranging from 100 -3.1  $\mu\text{g}/\text{mouse}$  of IL-4 were administered twice daily for the first 5 days of infection. Mice were monitored for weight change and mortality.

<sup>3</sup>P<0.05 compared to non infected controls.

<sup>4</sup>P>0.05 compared to non infected controls.

**Supplemental Table 3.** A/NCR and C57BL/6 mice vaccinated with Dryvax<sup>TM</sup> 7 days before infection are not protected against an ECTV-IL-4 infection.

| Challenge virus <sup>1</sup> | Mouse Strain | Dryvax <sup>TM2</sup> | Mean time to death | Mortality at 21 days p.i. (%) |
|------------------------------|--------------|-----------------------|--------------------|-------------------------------|
| -11KL-IL-4                   | A/NCR        | -                     | 7±0                | 8/8 (100)                     |
|                              | A/NCR        | +                     | 7.4±0.5            | 8/8 (100)                     |
|                              | C57BL/6      | -                     | 7.0±0              | 8/8 (100)                     |
|                              | C57BL/6      | +                     | 10.6±1.4           | 7/7 (100)                     |
| WT                           | A/NCR        | -                     | 7.4±0.2            | 8/8 (100)                     |
|                              | A/NCR        | + <sup>3</sup>        | NA <sup>4</sup>    | 0/8 (0)                       |

<sup>1</sup>Mice were infected in the left-rear FP with  $2.4 \times 10^3$  PFU of ECTV-IL-4.

<sup>2</sup>Mice were vaccinated in the right-rear FP with  $2.4 \times 10^4$  PFU Dryvax<sup>TM</sup> 7 days before infection with ECTV-11K-IL-4.

<sup>3</sup>This group of mice was immunized by scarification 4 days pre infection.

<sup>4</sup>Not applicable.

**Supplemental Table 4.** Vaccination with ECTV provides more efficacious protection against ECTV-IL-4 infection than vaccination with Dryvax™.

| ECTV-IL-4 dose (PFU) <sup>1</sup> | Immunization         |                   |         | Mean time to death    | Mortality (%)          |
|-----------------------------------|----------------------|-------------------|---------|-----------------------|------------------------|
|                                   | Dryvax™ <sup>2</sup> | ECTV <sup>3</sup> | Placebo |                       |                        |
| 16                                | +                    | -                 | -       | 23±5.0 <sup>4</sup>   | 6/6 (100) <sup>5</sup> |
| 160                               | +                    | -                 | -       | 19.8±6.1 <sup>4</sup> | 4/6 (67) <sup>5</sup>  |
| 1600                              | +                    | -                 | -       | 6.6±1.7 <sup>5</sup>  | 5/6 (83) <sup>5</sup>  |
| 16                                | -                    | +                 | -       | NA <sup>6</sup>       | 0/2 (0) <sup>4</sup>   |
| 160                               | -                    | +                 | -       | NA                    | 0/5 (0) <sup>4</sup>   |
| 1600                              | -                    | +                 | -       | NA                    | 0/4 (0) <sup>4</sup>   |
| 16                                | -                    | -                 | +       | 8.4±0.2               | 6/6 (100)              |
| 160                               | -                    | -                 | +       | 8±0                   | 6/6 (100)              |
| 1600                              | -                    | -                 | +       | 8±0                   | 6/6 (100)              |
| N/A                               | -                    | -                 | -       | NA                    | 0/6 (0) <sup>4</sup>   |

<sup>1</sup>C57BL/6 mice were IN infected with the indicated dose of ECTV-11KL-IL-4 at 49 days post vaccination with Dryvax™ or ECTV or saline.

<sup>2</sup>Mice were vaccinated in the right-rear FP with  $7.6 \times 10^4$  PFU of Dryvax™ 49 days prior to infection.

<sup>3</sup> Mice were vaccinated in the right-rear FP with  $6.1 \times 10^3$  PFU of ECTV 49 days prior to infection.

<sup>4</sup>P<0.05 compared to infected and placebo treated controls.

<sup>5</sup>P>0.05 compared to infected and placebo treated controls.

<sup>6</sup>Not applicable.

**Supplemental Table 5.** VIG treatment does not protect A/NCR mice against a FP infection with ECTV-11KL-IL-4.

| <b>Virus<sup>1</sup></b> | <b>VIG<sup>2</sup> T=-4</b> | <b>Placebo T=-4</b> | <b>Mean time to death</b> | <b>Mortality (%)</b>   |
|--------------------------|-----------------------------|---------------------|---------------------------|------------------------|
| -WT                      | -                           | +                   | 8.0±0.4                   | 4/4 (100)              |
| -WT                      | +                           | -                   | 7.5±0.5 <sup>3</sup>      | 4/4 (100) <sup>4</sup> |
| -11KL-IL-4               | -                           | +                   | 6±0                       | 4/4 (100)              |
| -11KL-IL-4               | +                           | -                   | 7±0                       | 4/4 (100) <sup>4</sup> |

<sup>1</sup>A/NCR mice were inoculated in the FP with 130 PFU of ECTV-WT or ECTV-11KL-IL-4.

<sup>2</sup>Indicated mice were treated with VIG (2g/Kg; 40 mg/mouse in 0.75 ml by IP route) at 4 days prior to infection or with vehicle.

<sup>3</sup>P=0.6 compared to ECTV-WT mice receiving vehicle.

<sup>4</sup>P=1.0 compared to vehicle treated controls.

**Supplemental Table 6.** Combination of an antiviral and neutralizing IL-4 mAB protects against ECTV-11KL-IL-4 disease in A/NCR and C57BL/6 mice.

| Challenge virus | Mouse Strain         | Dose (PFU) | Treatments    |             |     | Mean time to death       | Mortality at 21 days p.i. (%) |
|-----------------|----------------------|------------|---------------|-------------|-----|--------------------------|-------------------------------|
|                 |                      |            | Anti IL-4 mAB | Control mAB | CDV |                          |                               |
| -11KL-IL-4      | A/NCR <sup>1</sup>   | 1000       | +             | -           | -   | 7 ± 0 <sup>3</sup>       | 8/8 (100) <sup>3</sup>        |
|                 | A/NCR <sup>1</sup>   | 1000       | +             | -           | +   | -                        | 0/8 (0) <sup>4</sup>          |
|                 | A/NCR <sup>1</sup>   | 1000       | -             | +           | -   | 5.9 ± 0.4 <sup>3</sup>   | 8/8 (100) <sup>3</sup>        |
|                 | A/NCR <sup>1</sup>   | 1000       | -             | +           | +   | 12.8 ± 1.9 <sup>4</sup>  | 8/8 (100) <sup>3</sup>        |
|                 | A/NCR <sup>1</sup>   | 1000       | -             | -           | -   | 6 ± 0                    | 8/8 (100) <sup>3</sup>        |
|                 | C57BL/6 <sup>2</sup> | 15         | +             | -           | -   | 11.6 ± 3.2 <sup>4</sup>  | 5/8 (62) <sup>3</sup>         |
|                 | C57BL/6 <sup>2</sup> | 15         | +             | -           | +   | -                        | 0/7 (0) <sup>4</sup>          |
|                 | C57BL/6 <sup>2</sup> | 15         | -             | +           | -   | 7.5 ± 0.53 <sup>3</sup>  | 8/8 (100) <sup>3</sup>        |
|                 | C57BL/6 <sup>2</sup> | 15         | -             | +           | +   | 13.8 ± 0.71 <sup>4</sup> | 7/7 (100) <sup>3</sup>        |
|                 | C57BL/6 <sup>2</sup> | 15         | -             | -           | -   | 7.4 ± 0.52               | 8/8 (100)                     |

<sup>1</sup>1000 PFU infected A/NCR mice were injected IP with 2 mg/mouse of rat anti-IL-4 (clone 11B11, IgG1) or rat anti-p30 gag capsid protein (clone R187) on days T=-1, +1, +3, and +5. Mice were challenged in the presence or absence of 12.5mg/kg of cidofovir (CDV) injected IP on days T=0, 1, 2, 3, 4, and 5.

<sup>2</sup>15 PFU infected C57BL/6 mice were injected IP with 2 mg/mouse of the indicated mAB on days T=-1, +0, +1, +2, +4 and +6. Mice were challenged in the presence or absence of an optimal course of CDV.

Data from A/NCR and C57BL/6 experiments were reported from independent experiments.

<sup>3</sup>P>0.05 compared to non-treated infected controls.

<sup>4</sup>P<0.05 compared to non-treated infected controls.



**Supplemental Table 7.** The effect of prime boost vaccination and antiviral treatment on the course of ECTV IL-4 lethally in infected A/NCR mice.

| Challenge virus <sup>1</sup> | Dose (PFU) | Treatments                              |                                         |     | Mean time to death       | Mortality at 21 days p.i. (%) |
|------------------------------|------------|-----------------------------------------|-----------------------------------------|-----|--------------------------|-------------------------------|
|                              |            | Dryvax <sup>TM</sup> prime <sup>1</sup> | Dryvax <sup>TM</sup> boost <sup>2</sup> | CDV |                          |                               |
| -11KL-IL-4                   | 25         | +                                       | -                                       | -   | 10.8 ± 1.9               | 8/8 (100)                     |
|                              |            | +                                       | -                                       | +   | 20.3 ± 5.3 <sup>4</sup>  | 7/8 (87.5) <sup>5</sup>       |
|                              |            | +                                       | +                                       | -   | 14.7 ± 5.4 <sup>5</sup>  | 6/8 (75) <sup>5</sup>         |
|                              |            | +                                       | +                                       | +   | NA <sup>3</sup>          | 0/8 (0) <sup>4</sup>          |
|                              | 250        | +                                       | -                                       | -   | 8.6 ± 1.7 <sup>4</sup>   | 8/8 (100) <sup>5</sup>        |
|                              |            | +                                       | -                                       | +   | 28 ± 15 <sup>4</sup>     | 6/8 (75) <sup>5</sup>         |
|                              |            | +                                       | +                                       | -   | 12.8 ± 5.2 <sup>5</sup>  | 8/8 (100) <sup>5</sup>        |
|                              |            | +                                       | +                                       | +   | 50.8 ± 25.7 <sup>4</sup> | 4/8 (50) <sup>5</sup>         |
|                              | 2500       | +                                       | -                                       | -   | 8.8 ± 1.9 <sup>5</sup>   | 8/8 (100) <sup>5</sup>        |
|                              |            | +                                       | -                                       | +   | 37.5 ± 0.7 <sup>4</sup>  | 2/8 (25) <sup>4</sup>         |
|                              |            | +                                       | +                                       | -   | 17.3 ± 11.5 <sup>5</sup> | 8/8 (100) <sup>5</sup>        |
|                              |            | +                                       | +                                       | +   | 29 ± 16.3 <sup>4</sup>   | 2/8 (25) <sup>4</sup>         |

<sup>1</sup>A/NCR mice were vaccinated with 2.4x10<sup>4</sup> PFU/mouse of Dryvax<sup>TM</sup> smallpox vaccine at the base of the tail.

<sup>2</sup>At 4 weeks post-vaccination the mice were boosted with 2.4x10<sup>4</sup> PFU of Dryvax<sup>TM</sup> vaccine and 7 days later were challenged with the indicated dose of virus in the presence of an optimal course of CDV (see supplemental table 5).

<sup>3</sup>Not applicable.

<sup>4</sup>P<0.05 compared to mice receiving Dryvax<sup>TM</sup> primed and challenged with 25 PFU of virus.

<sup>5</sup>P>0.05 compared to mice receiving Dryvax<sup>TM</sup> primed and challenged with 25 PFU of virus.

**Supplemental Table 8.** Combination therapy with ST-246 and CDV protects A/NCR mice against intranasal infection with ECTV-11KM-IL-4<sup>1</sup>.

| Virus <sup>2</sup> | ST-246 <sup>3</sup> | CDV <sup>4</sup> | ST-246 veh <sup>5</sup> | CDV veh <sup>6</sup> | Mean time to death    | Mortality (%)             |
|--------------------|---------------------|------------------|-------------------------|----------------------|-----------------------|---------------------------|
| -11KL-IL-4         | -                   | -                | -                       | -                    | 5.6±0.2               | 16/16 (100)               |
|                    | -                   | -                | +                       | +                    | 5.6±0.2 <sup>8</sup>  | 16/16 (100) <sup>8</sup>  |
|                    | +                   | -                | -                       | +                    | 12.9±1.2 <sup>7</sup> | 14/16 (87.5) <sup>8</sup> |
|                    | -                   | +                | +                       | -                    | 18.2±4.1 <sup>7</sup> | 11/16 (68.8) <sup>7</sup> |
|                    | +                   | +                | -                       | -                    | NA                    | 0/16 (0) <sup>9</sup>     |
| Mock               | -                   | -                | +                       | +                    | NA                    | 0/16 (0)                  |
|                    | -                   | -                | -                       | -                    | NA                    | 0/16 (0)                  |

<sup>1</sup>Pooled data from 2 independent experiments.

<sup>2</sup>Mice were infected IN with 24 or 600 PFU of ECTV-11KL-IL-4 or were mock infected.

<sup>3</sup>Mice were dosed with 100 mg/kg of ST-246 for 10 days starting 6 hours p.i.

<sup>4</sup>Mice were dosed with 100 mg/kg of CDV on T=-1, 3, 7, 11, and 15.

<sup>5</sup>ST-246 vehicle controls received 0.75% methylcellulose and 1% tween.

<sup>6</sup>CDV vehicle controls received USP sterile saline.

<sup>7</sup>P<0.05 compared to untreated and infected mice.

<sup>8</sup>P>0.05 compared to untreated and infected mice.

<sup>9</sup>Not applicable.
